# Supplementary material for: Identification of atypical circulating tumor cells with prognostic value in metastatic breast cancer patients
Source: bioRxiv or medRxiv preprint supplement (doi:10.1101/2020.09.29.20203653), 2021-10-05
Supplement: Supplementary file [file 2020.09.29.20203653-6.pdf]

**Supplementary Table 3. Univariate and multivariate analysis for PFS according to molecular and cytological profiles**

| PFS                            |                       | Univariate |                  |                 | Multivariate |                  |         |
|--------------------------------|-----------------------|------------|------------------|-----------------|--------------|------------------|---------|
|                                |                       | N          | HR [95%CI]       | p-value         | N            | HR [95%CI]       | p-value |
| Epithelial                     | positive vs. negative | 23         | 0.69 [0.16-3.02] | 0.623           |              |                  |         |
| Mixed epithelial-mesenchymal   | positive vs. negative | 23         | 2.87 [1.08-7.68] | <b>3.53E-02</b> | 23           | 1.01 [1.00-1.03] | 0.082   |
| Mesenchymal                    | positive vs. negative | 23         | 0.73 [0.30-1.75] | 0.483           |              |                  |         |
| Stem cell                      | positive vs. negative | 23         | 1.88 [0.73-4.84] | 0.19            |              |                  |         |
| Drug resistance                | positive vs. negative | 17         | 2.07 [0.72-5.91] | 0.175           |              |                  |         |
| all atypical circulating cells | positive vs. negative | 23         | 1.72 [0.72-4.11] | 0.218           |              |                  |         |
| gCTC                           | positive vs. negative | 23         | 3.41 [1.20-9.69] | <b>2.12E-02</b> | 23           | 2.90 [0.98-8.60] | 0.054   |
| iCTC                           | positive vs. negative | 23         | 1.67 [0.68-4.11] | 0.263           |              |                  |         |
| CTM                            | positive vs. negative | 23         | 0.93 [0.37-2.35] | 0.882           |              |                  |         |
